# Supplementary material for: Biomonitoring of Airborne Microplastic Deposition in Semi-Natural and Rural Sites Using the Moss Hypnum cupressiforme
Source: MDPI journal article supplement (doi:10.3390/plants12050977), 2023-02-21
Supplement: s1 [file s1]

**Table S1. Microplastic distribution (%) divided into size classes from 0 to 5 mm**

| <b>Classes*<br/>mm</b> | <b>MTF</b> | <b>MTV</b> | <b>ARP</b> | <b>PTR</b> | <b>MTB</b> | <b>MRC</b> | <b>MTS</b> |
|------------------------|------------|------------|------------|------------|------------|------------|------------|
| <b>&lt;0.2</b>         | 4          | 7          | 6          | 6          | 4          | 6          | 4          |
| <b>0.2-0.4</b>         | 5          | 6          | 6          | 6          | 6          | 6          | 10         |
| <b>0.4-0.6</b>         | 5          | 11         | 10         | 9          | 8          | 6          | 8          |
| <b>0.6-0.8</b>         | 10         | 14         | 10         | 9          | 12         | 12         | 11         |
| <b>0.8-1.0</b>         | 8          | 8          | 10         | 10         | 13         | 9          | 7          |
| <b>1.0-1.2</b>         | 7          | 7          | 10         | 9          | 15         | 10         | 7          |
| <b>1.2-1.4</b>         | 6          | 6          | 9          | 8          | 8          | 12         | 8          |
| <b>1.4-1.6</b>         | 5          | 8          | 7          | 10         | 11         | 12         | 5          |
| <b>1.6-1.8</b>         | 5          | 11         | 6          | 8          | 9          | 7          | 9          |
| <b>1.8-2.0</b>         | 7          | 3          | 4          | 6          | 6          | 4          | 6          |
| <b>2.0-2.2</b>         | 8          | 8          | 8          | 4          | 5          | 6          | 6          |
| <b>2.2-2.4</b>         | 5          | 3          | 2          | 3          | 1          | 3          | 9          |
| <b>2.4-2.6</b>         | 5          | 4          | 4          | 2          | 2          | 3          | 2          |
| <b>2.6-2.8</b>         | 5          | 1          | 2          | 1          | 0          | 1          | 4          |
| <b>2.8-3.0</b>         | 4          | 1          | 1          | 2          | 0          | 2          | 2          |
| <b>3.0-3.2</b>         | 2          | 1          | 2          | 3          | 0          | 1          | 1          |
| <b>3.2-3.4</b>         | 0          | 0          | 0          | 1          | 0          | 0          | 1          |
| <b>3.4-3.6</b>         | 1          | 1          | 0          | 1          | 0          | 0          | 0          |
| <b>3.6-3.8</b>         | 1          | 0          | 0          | 0          | 0          | 0          | 0          |
| <b>3.8-4.0</b>         | 3          | 0          | 0          | 0          | 0          | 0          | 0          |
| <b>4.0-4.2</b>         | 0          | 0          | 0          | 1          | 0          | 0          | 1          |
| <b>4.2-4.4</b>         | 0          | 0          | 0          | 0          | 0          | 0          | 0          |
| <b>4.4-4.6</b>         | 1          | 0          | 0          | 0          | 0          | 0          | 0          |
| <b>4.6-4.8</b>         | 1          | 0          | 0          | 0          | 0          | 0          | 0          |
| <b>4.8-5.0</b>         | 0          | 0          | 0          | 0          | 0          | 0          | 0          |

\*Each distribution class have Lower value  $\leq$  N° of MPs < Higher value
