# Supplementary figures and images for: Biomonitoring of Airborne Microplastic Deposition in Semi-Natural and Rural Sites Using the Moss Hypnum cupressiforme
Source: MDPI journal article supplement (doi:10.3390/plants12050977), 2023-02-21

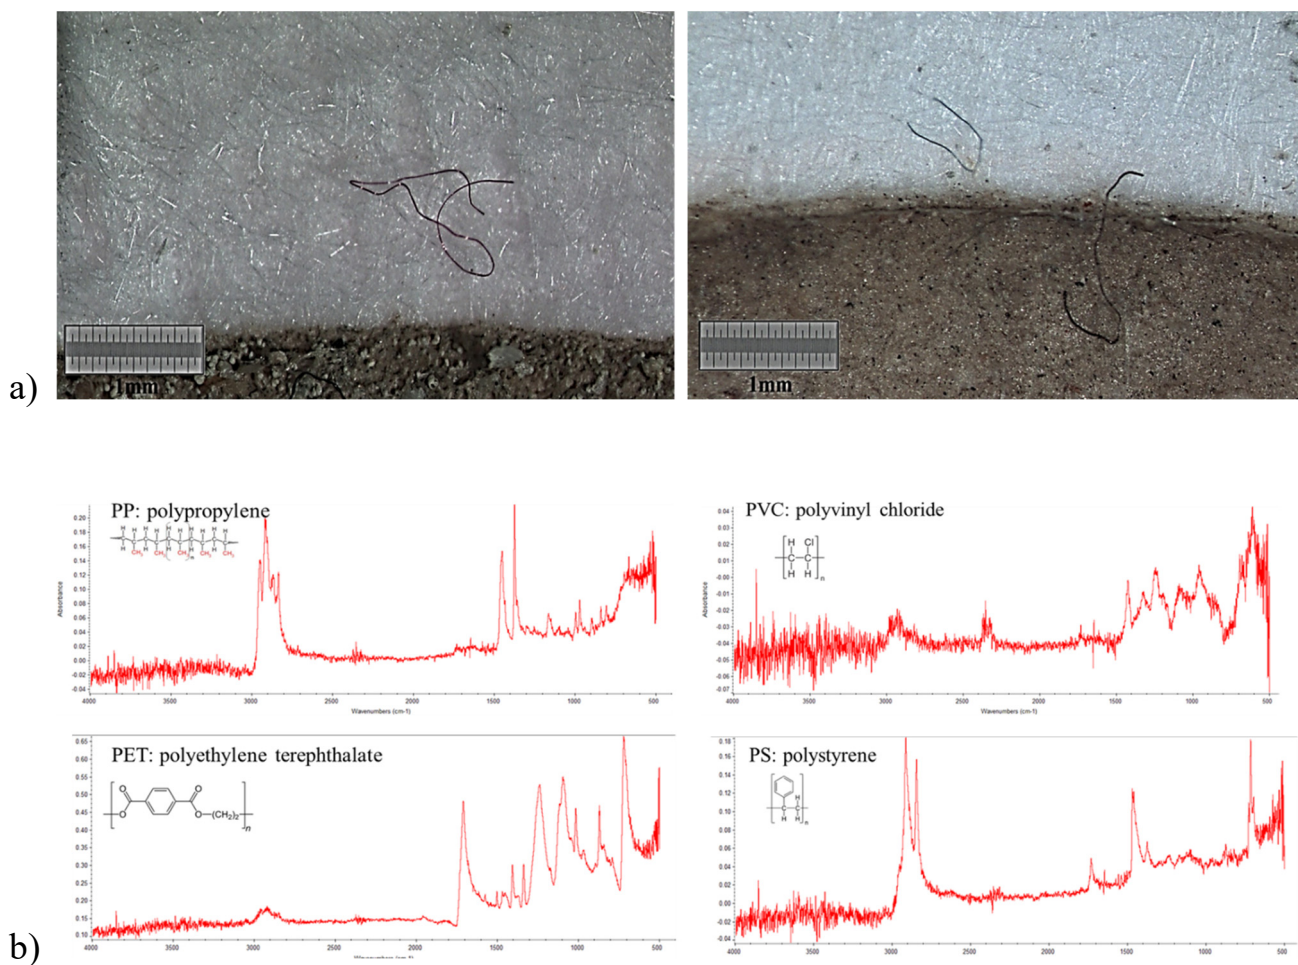

Supplement: s1 [file s1]
